# Supplementary material
Source: publisher figshare collection journal article supplement (https://acs.figshare.com/ndownloader/files/5790936)

# A versatile indium trichloride mediated Prins-type reaction to unsaturated heterocycles

Adrian P. Dobbs,<sup>\*a</sup> Sebastien J.J. Guesné,<sup>a</sup> Saša Martinovi,<sup>a</sup> Simon J. Coles<sup>b</sup> and Michael B. Hursthouse<sup>b</sup>

<sup>a</sup> School of Chemistry, University of Exeter, Stocker Road, Exeter EX4 4QD, UK.

<sup>b</sup> EPSRC National Crystallographic Service, Department of Chemistry, University of Southampton, Highfield, Southampton. SO17 1BJ

A.Dobbs@exeter.ac.uk

## Supporting Information

Representative experimental procedures and spectral data for compounds 2-4 & 6 and those in Tables 1 and 2 are provided and crystallographic CIF files for compounds 3 & 6.

|                                                                                                 |     |
|-------------------------------------------------------------------------------------------------|-----|
| General                                                                                         | S2  |
| (±)-Cis-2-Benzhydryl-6-methyl-5,6-dihydro-2H-pyran ( <b>2</b> )                                 | S2  |
| (±)-2β-Benzhydryl-3α,4α-diacetoxy-6β-methyltetrahydropyran ( <b>3</b> )                         | S3  |
| General method for the preparation of thiols ( <b>4</b> ) from alcohols                         | S4  |
| Z-4-Trimethylsilylbut-3-en-1-thiol                                                              | S5  |
| (±)-Z-5-trimethylsilylpent-4-en-2-thiol                                                         | S5  |
| General method for cyclisation reactions of aldehydes with Z-vinylsilyl thiols                  | S6  |
| (±)-2-Benzyl-5,6-dihydro-2H-thiopyran (Table 1 entry 1)                                         | S7  |
| (±)-2-Pentyl-5,6-dihydro-2H-thiopyran (Table 1 entry 2)                                         | S7  |
| (±)-6-Methyl-2-(2-phenylethyl)-5,6-dihydro-2H-thiopyran (Table 1 entry 3)                       | S8  |
| (±)-6-Methyl-2-pentyl-5,6-dihydro-2H-thiopyran (Table 1 entry 4)                                | S8  |
| General procedure for the cyclisation of homoallyl amines with aldehydes                        | S9  |
| (±)-1,6-Dibenzyl-1,2,3,6-tetrahydropyridine (Table 2 entry 1)                                   | S9  |
| (±)-6-Pentyl-1-phenyl-1,2,3,6-tetrahydropyridine (Table 2 entry 3)                              | S10 |
| (±)-6-Benzyl-1-propyl-1,2,3,6-tetrahydropyridine (Table 2 entry 4)                              | S10 |
| (±)-1,6-Dibenzyl-2-methyl-1,2,3,6-tetrahydropyridine (Table 2 entry 5) ( <b>6</b> )             | S11 |
| (±)-1-Benzyl-2-methyl-6-pentyl-1,2,3,6-tetrahydropyridine (Table 2 entry 6)                     | S11 |
| (±)-6-Pentyl-2-methyl-1-propyl-1,2,3,6-tetrahydropyridine (Table 2 entry 7)                     | S12 |
| (±)-6-Benzyl-2-methyl-1-propyl-1,2,3,6-tetrahydropyridine (Table 2 entry 8)                     | S13 |
| <sup>1</sup> H NMR for (±)-Cis-2-Benzhydryl-6-methyl-5,6-dihydro-2H-pyran ( <b>2</b> )          | S14 |
| <sup>13</sup> C NMR for (±)-Cis-2-Benzhydryl-6-methyl-5,6-dihydro-2H-pyran ( <b>2</b> )         | S15 |
| <sup>1</sup> H NMR for (±)-2β-Benzhydryl-3α,4α-diacetoxy-6β-methyltetrahydropyran ( <b>3</b> )  | S16 |
| <sup>13</sup> C NMR for (±)-2β-Benzhydryl-3α,4α-diacetoxy-6β-methyltetrahydropyran ( <b>3</b> ) | S17 |
| <sup>1</sup> H NMR for (±)-1,6-Dibenzyl-2-methyl-1,2,3,6-tetrahydropyridine ( <b>6</b> )        | S18 |
| <sup>13</sup> C NMR for (±)-1,6-Dibenzyl-2-methyl-1,2,3,6-tetrahydropyridine ( <b>6</b> )       | S19 |

## A. General

Dichloromethane was distilled over calcium hydride; diethyl ether, THF and toluene were distilled over sodium and benzophenone, which was used as an indicator. All other solvents were obtained anhydrous from Aldrich and used directly into the reaction vessel. All reactions were carried out under an atmosphere of nitrogen unless otherwise stated, using a vacuum/nitrogen manifold. All glassware, syringes and needles were predried in an oven (120-140 °C) and cooled in a nitrogen atmosphere prior to use. Stirring was by internal magnetic follower. All chemicals were purified by distillation or recrystallisation where appropriate. Commercially available compounds were generally used without further purification.

All reactions were followed by TLC. Analytical thin layer chromatography was carried out using aluminium backed plates coated with Merck Kieselgel 60 GF<sub>254</sub>. Plates were visualised under UV light (at 254 nm) or by staining with acidic ceric ammonium molybdate or acidic potassium permanganate followed by heating. Flash chromatography was carried out using Matrex silica 60, 230-400 mesh; samples were applied as a saturated solution in an appropriate solvent.

Proton (<sup>1</sup>H) NMR spectra were recorded at either 300 MHz or 400 MHz and carbon (<sup>13</sup>C) NMR spectra at 75 MHz or 100 MHz in deuterated. NMR chemical shifts (δ) are quoted in ppm (parts per million) relative to an internal standard (CDCl<sub>3</sub>). Spectroscopic data is annotated with the following abbreviations: br - broad, s - singlet, d - doublet, t - triplet, and m - multiplet. Coupling constants are expressed in Hz. <sup>1</sup>H and <sup>13</sup>C NMR assignments were made using COSY (<sup>1</sup>H-<sup>1</sup>H correlation) and HMQC (<sup>1</sup>H-<sup>13</sup>C correlation) NMR techniques.

Compounds characterised by high-resolution mass spectrometry were chromatographically homogeneous. Infrared (IR) spectra were recorded in the range 4000-600 cm<sup>-1</sup> with internal calibration. Spectra were recorded as KBr discs or as thin films between NaCl plates.

### (±)-Cis-2-Benzhydryl-6-methyl-5,6-dihydro-2H-pyran (2)

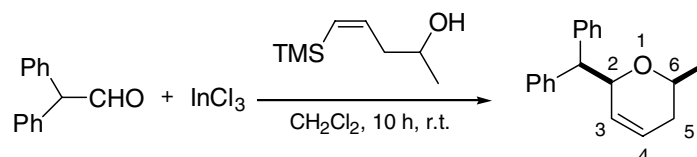

Indium (III) chloride (0.44 g, 2 mmol) was added to a 50 ml round bottom flask containing diphenylacetaldehyde (1 eq., 0.39 g, 2 mmol) dissolved in dry DCM (20 ml) under an atmosphere of nitrogen and the resulting solution was stirred for 1 hour. After this time *Z*-5-trimethylsilylpent-4-en-2-ol (1 eq., 0.32g, 2 mmol) was added and the reaction mixture was stirred at room temperature for a further 16 hours. The reaction mixture was then quenched with distilled water (10 ml) and the water layer was extracted with dichloromethane (40 ml). The combined organic extracts were dried with magnesium sulfate. The solvent was removed *in vacuo* and the reaction mixture purified by flash column chromatography (hexane:diethyl ether 10:1) to give the *title compound* isolated as a colourless solid (0.41 g, 78%);  $R_f$  0.43 (petrol:diethyl ether 10:1); Mp 75-77 °C (from petrol); Found  $[M+H]^+$  265.1590:  $C_{19}H_{20}O+H$  requires 265.1592; Found: C, 86.3; H, 7.7. Calc. for  $C_{19}H_{20}O$ : C, 86.3; H, 7.6%;  $\nu_{max}/cm^{-1}$  (KBr) 3027 [Ar(C-H)], 2970 (OCH), 1654 (C=C), 1598, 1495, 1449, 1388, 1183 (C-O), 1086;  $\delta_H$  (400 MHz;  $CDCl_3$ ) 7.19-7.39 (10H, m, Ar-H), 5.77 (1H, m, C(4)H), 5.58 (1H, dt,  $J$  10.3, 1.9, C(3)H), 4.87 (1H, m, C(2)H), 4.02 (1H, d,  $J$  8.1,  $Ph_2CH$ ), 3.75 (1H, m, C(6)H), 1.95 (2H, m, C(5)H<sub>2</sub>), 1.23 (3H, d,  $J$  6.4, C(6)CH<sub>3</sub>);  $\delta_C$  (100 MHz;  $CDCl_3$ ) 142.5 ( $C_{ipso}$ ), 142.0 ( $C_{ipso}$ ), 127.9-128.9 [overlapping 8×(C-Ar), C(3)H], 126.3 (C(4)H), 126.1 (C-Ar), 125.9 (C-Ar), 77.3 (C(2)H), 70.3 (C(6)H), 56.3 (Ar<sub>2</sub>CH), 32.8 (C(5)H<sub>2</sub>), 21.7 (C(6)CH<sub>3</sub>);  $m/z$  (CI) 265  $[(MH)^+$ , 90%], 247  $[(MH)^+-H_2O, 100]$ .

**(±)-2β-Benzhydryl-3α,4α-diacetoxy-6β-methyltetrahydropyran (3)**

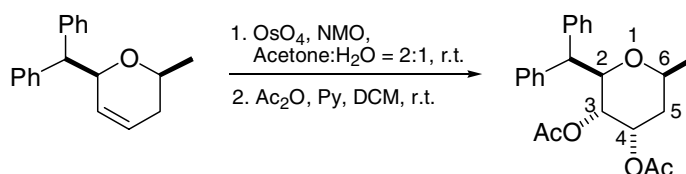

(±)-*Cis*-2-Benzhydryl-6-methyloxacyclohex-3-ene (0.09 g, 0.3 mmol) was placed into a round bottom flask (25 ml) and dissolved in acetone:water 2:1 (9 ml). 4-Methylmorpholine *N*-oxide was added (0.09 g, 0.7 mmol, 2eq.), followed by two crystals of osmium tetroxide. The flask was sealed with a stopper and the reaction mixture stirred for 48 hours at room temperature. After this time the reaction mixture was cooled to 0 °C, saturated aqueous sodium bisulfite (6 ml) was added and the reaction mixture allowed to

warm to room temperature. The aqueous layer was extracted with ethyl acetate (3×20 ml). The combined organic layers were washed with brine (2×10 ml), dried over MgSO<sub>4</sub>, filtered and concentrated *in vacuo* to give (±)-2β-benzhydryl-3α,4α-dihydroxy-6β-methyloxacyclohexane (0.06 g, 61%) which was used without further purification. (±)-2β-benzhydryl-3α,4α-dihydroxy-6β-methyloxacyclohexane (0.06 g) was dissolved in pyridine:DCM 1:1 (10 ml), acetic anhydride was added (0.61 ml, 6.4 mmol, 16 eq.) and the reaction mixture was stirred overnight (19 hours). After this time the reaction mixture was quenched with saturated aqueous sodium hydrogencarbonate solution (5 ml), the layers were separated and the aqueous layer was extracted with DCM (3×10 ml). The organic layer was washed with 2M hydrochloric acid (2×10 ml), saturated brine solution (10 ml) and dried over MgSO<sub>4</sub>. The solvent was removed *in vacuo* to give (±)-2β-benzhydryl-3α,4α-diacetoxy-6β-methyltetrahydropyran as colourless crystals (0.04 g, 57%; overall yield 35%); Mp 144-146 °C (from hexane/diethyl ether); Found [M+H]<sup>+</sup> 383.1851; C<sub>23</sub>H<sub>26</sub>O<sub>5</sub>+H requires 383.1858; Found: C, 72.3; H, 6.8. Calc. for C<sub>23</sub>H<sub>26</sub>O<sub>5</sub>: C, 72.2; H, 6.8%;  $\nu_{\max}/\text{cm}^{-1}$  (KBr) 3088, 3052, 3027 [Ar(C-H)], 2883 (OCH), 1736, (C=O), 1598, 1495, 1449, 1367, 1137 (C-O), 1055;  $\delta_{\text{H}}$  (400 MHz; CDCl<sub>3</sub>) 7.19-7.44 (10H, m, Ar-H), 5.40 (1H, m, Ph<sub>2</sub>CH), 4.48 (2H, m, C(2)H, C(3)H), 4.09 (1H, m, C(4)H), 3.96 (1H, m, C(6)H), 2.11 (3H, s, OCOCH<sub>3</sub>), 1.96 (3H, s, OCOCH<sub>3</sub>), 1.79 (1H, m, C(5)HH), 1.58 (1H, m, C(5)HH), 1.20 (3H, d, *J* 6.2, C(6)CH<sub>3</sub>);  $\delta_{\text{C}}$  (100 MHz; CDCl<sub>3</sub>) 170.3 [C<sub>quat</sub>(OCOCH<sub>3</sub>)], 169.6 [C<sub>quat</sub>(OCOCH<sub>3</sub>)], 143.1 (C<sub>ipso</sub>), 139.7 (C<sub>ipso</sub>), 130.2 [overlapping 2×C(Ar)], 128.7 [overlapping 2×C(Ar)], 128.2 [overlapping 2×C(Ar)], 128.0 [overlapping 2×C(Ar)], 126.6 C(Ar), 126.2 C(Ar), 74.9 and 69.8 [C(3 and 2)H], 68.4 (C(6)H), 67.7 (Ph<sub>2</sub>CH), 51.1 (C(4)H), 37.4 (C(5)H<sub>2</sub>), 21.1 [overlapping C(3 and 4)CHOCOCH<sub>3</sub>], 20.8 [C(6)CH<sub>3</sub>]; *m/z* (CI) 383 [(MH)<sup>+</sup>, 5%], 323 [(MH)<sup>+</sup>-C<sub>2</sub>H<sub>4</sub>O<sub>2</sub>, 10], 263 [(MH)<sup>+</sup>-2×(C<sub>2</sub>H<sub>4</sub>O<sub>2</sub>), 35], 245 [(MH)<sup>+</sup>-C<sub>4</sub>H<sub>10</sub>O<sub>5</sub>, 25], 215 [(MH)<sup>+</sup>-C<sub>6</sub>H<sub>16</sub>O<sub>5</sub>, 25], 143 [(MH)<sup>+</sup>-C<sub>12</sub>H<sub>16</sub>O<sub>5</sub>, 100].

#### General method for the preparation of thiols (4) from alcohols

Diethyl azodicarboxylate (2 eq., 1.9 ml, 12 mmol) was added to a vigorously stirred solution of triphenylphosphine (2 eq., 3.32 g, 12 mmol) in THF (100 ml) at 0 °C. The mixture was stirred at 0 °C for 30 minutes. A solution of 4-trimethylsilylbut-3-en-1-ol (1 eq., 6 mmol) or (±)-Z-5-trimethylsilylpent-4-en-2-ol (1 eq., 6 mmol) and thioacetic acid (2



eq., 0.9 ml, 12 mmol) in THF (50 ml) was added dropwise over 10 minutes and the resulting mixture stirred for 1 hour at 0 °C and 1 hour at ambient temperature. A clear yellow solution was formed. The solution was concentrated *in vacuo* and the residue was purified by flash chromatography over silica gel, eluting with petrol:diethyl ether 7:1 to give the thioacetate (0.83 g, 61%). The thioacetate (1 eq., 2 mmol) was then dissolved in anhydrous THF (25 ml) and added dropwise to a suspension of lithium aluminium hydride (4 eq., 0.25 g, 8 mmol) in anhydrous ether (15 ml) under a nitrogen atmosphere. The reaction mixture was stirred at ambient temperature for 30 minutes, and the excess lithium aluminium hydride was destroyed by careful addition of 1 M solution of hydrochloric acid (10 ml). The ether layer was separated and dried (MgSO<sub>4</sub>). After evaporation of the solvent, the crude reaction mixture was purified by flash chromatography (petrol:diethyl ether 7:1) to afford the product.

***Z*-4-Trimethylsilylbut-3-en-1-thiol**

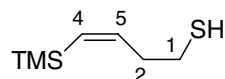

Clear oil

Overall yield for two steps 61%

R<sub>f</sub> 0.51 (petrol:ether 7:1)

Found [M+H]<sup>+</sup> 161.0817; C<sub>7</sub>H<sub>16</sub>SSi+H requires 161.0821.

ν<sub>max</sub>/cm<sup>-1</sup> (neat) 2969, 1601 (C=C), 843 (S-H), 687 (C-S)

δ<sub>H</sub> (300 MHz; CDCl<sub>3</sub>) 6.11 (1H, dt, *J* 14.0, 7.2, C(3)H), 5.52 (1H, d, *J* 14.0, C(4)H), 2.44 (2H, m, C(1)H<sub>2</sub>), 2.31 (2H, m, C(2)H<sub>2</sub>), 1.27 (1H, t, *J* 7.6, SH), 0.06 (9H, s, 3×CH<sub>3</sub>); δ<sub>C</sub> (100 MHz; CDCl<sub>3</sub>) 145.3 (C(3)H), 131.7 (C(4)H), 37.1 (C(1)H<sub>2</sub>), 24.2 (C(2)H<sub>2</sub>), 0.00 (TMS).

***(±)*-Z-5-trimethylsilylpent-4-en-2-thiol**

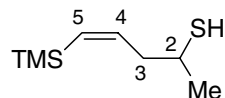

Clear oil

Overall yield for two steps 56%

R<sub>f</sub> 0.58 (petrol:ether 7:1)

Found [M+H]<sup>+</sup> 175.0961; C<sub>8</sub>H<sub>18</sub>SSi+H requires 175.0977

$\nu_{\max}/\text{cm}^{-1}$  (neat) 2960, 1608 (C=C), 840 (S-H), 686 (C-S)

$\delta_{\text{H}}$  (300 MHz; CDCl<sub>3</sub>) 6.18 (1H, ddd, *J* 14.1, 7.2, 6.9, C(4)H), 5.51 (1H, d, *J* 14.1, C(5)H), 2.91 (1H, m, C(2)H), 2.26 (2H, m, C(3)H<sub>2</sub>), 1.47 (1H, d, *J* 5.6, SH), 1.20 (3H, d, *J* 6.7, C(1)H<sub>3</sub>), 0.02 (9H, s, 3×CH<sub>3</sub>);  $\delta_{\text{C}}$  (100 MHz; CDCl<sub>3</sub>) 144.9 (C(4)H), 131.7 (C(5)TMS), 43.9 (C(3)H<sub>2</sub>), 35.1 (C(2)H), 24.6 (C(1)H<sub>3</sub>), -0.21 (3×CH<sub>3</sub>).

*m/z* (CI) 175 [(MH)<sup>+</sup>, 70%], 174 [(M-H)<sup>+</sup>, 100], 159 [(MH)<sup>+</sup>-CH<sub>3</sub>, 55], 133 [(MH)<sup>+</sup>-C<sub>3</sub>H<sub>6</sub>, 75].

### General method for cyclisation reactions of aldehydes with Z-vinylsilyl thiols

Indium chloride (1 mmol) was added to a solution of aldehyde (1 mmol) in dry dichloromethane (20 ml), under an atmosphere of nitrogen and the reaction mixture was stirred for 1 hour. After this time, the homoallylic thiol (1 mmol) was added and the reaction mixture stirred at room temperature for a further 5-16 hours. The reaction was monitored by TLC. Upon completion, the reaction mixture was quenched with distilled water (10 ml). The water layer was extracted with dichloromethane (2×40 ml) and the combined organic layer dried with magnesium sulfate. The solvent was removed *in vacuo* and the reaction mixture purified by flash column chromatography (hexane:diethyl ether 10:1) affording the cyclisation product as an oil.

**(±)-2-Benzyl-5,6-dihydro-2H-thiopyran (Table 1 entry 1)**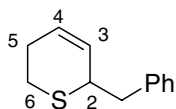

Pale yellow oil.

51%

R<sub>f</sub> (hexane:diethyl ether 10:1).

Found [M+H]<sup>+</sup> 191.0888; C<sub>14</sub>H<sub>18</sub>S+H requires 191.0895.

$\nu_{\max}/\text{cm}^{-1}$  (neat) 3015 [Ar(C-H)], 2834 (S-CH), 1651 (C=C), 1460, 741 (C-S), 696 (C-S)

$\delta_{\text{H}}$  (400 MHz; CDCl<sub>3</sub>) 7.36-7.17 (5H, m, Ar-H), 5.75-5.71 (2H, m, C(3)H & C(4)H), 3.42 (1H, m, C(2)H), 2.88 (2H, m, PhCH<sub>2</sub>), 2.61 (2H, m, C(6)H<sub>2</sub>), 2.23 (2H, m, C(5)H<sub>2</sub>).

**(±)-2-Pentyl-5,6-dihydro-2H-thiopyran (Table 1 entry 2)**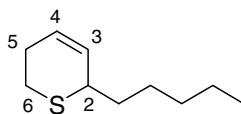

Pale yellow oil

53%

R<sub>f</sub> 0.85 (petrol:diethyl ether 10:1).

Found [M+H]<sup>+</sup> 171.1199; C<sub>10</sub>H<sub>18</sub>S+H requires 171.1208.

$\nu_{\max}/\text{cm}^{-1}$  (neat) 2955, 2858 (S-CH), 1649 (C=C), 700 (C-S).

$\delta_{\text{H}}$  (400 MHz; CDCl<sub>3</sub>) 5.71 (2H, m, C(3)H and C(4)H), 3.23 (1H, m, C(2)H), 2.67 (2H, m, C(6)H<sub>2</sub>), 2.22 (2H, m, C(5)H<sub>2</sub>), 1.51-1.21 (8H, m, overlapping 4xCH<sub>2</sub>), 0.83 (3H, t, *J* 6.8, CH<sub>3</sub>).

**(±)-6-Methyl-2-(2-phenylethyl)-5,6-dihydro-2H-thiopyran (Table 1 entry 3)**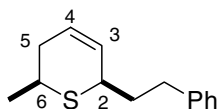

Pale yellow oil.

68%

$R_f$  0.81 (hexane:diethyl ether 10:1).

Found  $[M+H]^+$  219.1212.  $C_{14}H_{18}S+H$  requires 219.1207.

$\nu_{max}/cm^{-1}$  (neat) 3021 [Ar(C-H)], 2824 (S-CH), 1644 (C=C), 1460, 1255, 737 (C-S), 697 (C-S).

$\delta_H$  (400 MHz;  $CDCl_3$ ) 7.19-7.32 (5H, m, Ar-H), 5.82 (1H, m, C(3)H), 5.72 (1H, dt, 12.7, 1.9, C(4)H), 3.66 (1H, m, C(2)H), 3.03 (1H, m, C(6)H), 2.78 (2H, m, ArCH<sub>2</sub>CH<sub>2</sub>), 2.47 (1H, m, C(5)HH), 1.86-2.28 (3H, m, ArCH<sub>2</sub>CH<sub>2</sub>, C(5)HH), 1.30 (3H, d,  $J$  6.8, C(6)CH<sub>3</sub>);  $\delta_C$  (100 MHz;  $CDCl_3$ ) 141.7 ( $C_{ipso}$ ), 129.5 (C(4)H), 128.6 [overlapping 2×C(Ar)], 127.8 (C(3)H), 127.3 (C(Ar)), 125.9 [overlapping 2×C(Ar)], 40.1 (C(2)H), 38.6 (C(5)H<sub>2</sub>), 34.9 (ArCH<sub>2</sub>CH<sub>2</sub>), 34.5 (C(6)H), 32.8 (ArCH<sub>2</sub>CH<sub>2</sub>), 21.3 (C(6)CH<sub>3</sub>).

$m/z$  (CI) 219  $[(MH)^+]$ , 100%, 127  $[(MH)^+-C_7H_8]$ , 10].

**(±)-6-Methyl-2-pentyl-5,6-dihydro-2H-thiopyran (Table 1 entry 4)**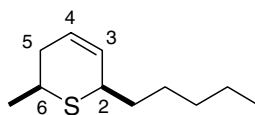

Pale yellow oil

54%

$R_f$  0.85 (petrol:diethyl ether 10:1).

Found  $[M+H]^+$  185.1365.  $C_{11}H_{20}S+H$  requires 185.1364.

$\nu_{max}/cm^{-1}$  (neat) 2960, 2852 (S-CH), 1654 (C=C), 702 (C-S).

$\delta_H$  (400 MHz;  $CDCl_3$ ) 5.75 (1H, m, C(3)H), 5.67 (1H, dt,  $J$  12.6, 6.6, C(4)H), 3.61 (1H, m, C(2)H), 3.01 (1H, m, C(6)H), 2.25 (1H, m, C(5)H), 1.99 (1H, m, C(5)H), 1.25-1.62

(overlapping 11H, m, C(6)CH<sub>3</sub>, C(2)CH<sub>2</sub>CH<sub>2</sub>CH<sub>2</sub>CH<sub>2</sub>CH<sub>3</sub>), 0.88 (3H, t, *J* 7.0, C(2)CH<sub>2</sub>CH<sub>2</sub>CH<sub>2</sub>CH<sub>2</sub>CH<sub>3</sub>); δ<sub>C</sub> (100 MHz; CDCl<sub>3</sub>) 129.9 C(4)H, 127.3 C(3)H, 40.9 C(2)H, 35.7 [1×CH<sub>2</sub>, C(2)CH<sub>2</sub>CH<sub>2</sub>CH<sub>2</sub>CH<sub>2</sub>CH<sub>3</sub>], 35.0 C(5)H<sub>2</sub>, 34.5 C(6)H, 31.7, 26.5 and 22.6 [3×CH<sub>2</sub>, C(2)CH<sub>2</sub>CH<sub>2</sub>CH<sub>2</sub>CH<sub>2</sub>CH<sub>3</sub>], 21.2 C(6)CH<sub>3</sub>, 14.1 C(2)CH<sub>2</sub>CH<sub>2</sub>CH<sub>2</sub>CH<sub>2</sub>CH<sub>3</sub>. *m/z* (CI) 185 [(MH)<sup>+</sup>, 100%], 128 [(MH)<sup>+</sup>-C<sub>4</sub>H<sub>9</sub>, 6].

## General procedure for the cyclisation of homoallyl amines with aldehydes

To a solution of indium trichloride (221 mg, 1.0 mmol) and aldehyde (1.0 mmol) in anhydrous acetonitrile (20 mL) at reflux was added dropwise the secondary amine (1.0 mmol). Once the reaction was completed (TLC check) the solution was concentrated and the residue obtained partitioned between dichloromethane (20 mL) and 1 M NaOH (20 mL). The aqueous layer was extracted with dichloromethane. The combined organic layers were washed with 1 M NaOH, dried (magnesium sulfate) and concentrated under reduced pressure. The residue was then purified by flash chromatography to give the corresponding tetrahydropyridine.

### (±)-1,6-Dibenzyl-1,2,3,6-tetrahydropyridine (Table 2 entry 1)

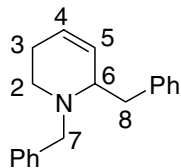

Yellow oil

95% yield

R<sub>f</sub> 0.35 (hexane:ethyl acetate:triethylamine 94:5:1)

Found: [MH]<sup>+</sup> 264.1752; C<sub>19</sub>H<sub>21</sub>N+H requires 264.1764.

ν<sub>max</sub>/cm<sup>-1</sup> (neat) 3084, 3060, 3025, 2921, 2800, 1635, 1602, 1494, 1452, 1363, 728, 698.

δ<sub>H</sub> (400 MHz; CDCl<sub>3</sub>) 7.35-7.16 (m, 10H, H<sub>Ph</sub>), 5.76-5.73 (m, 1H, H<sub>4</sub>), 5.53-5.49 (m, 1H, H<sub>5</sub>), 4.00 (d, *J* 13.2, 1H, H<sub>7</sub>), 3.56 (d, *J* 13.2, 1H, H<sub>7</sub>), 3.22-3.18 (m, 1H, H<sub>6</sub>), 3.11 (dd, *J* 5.4 and 13.1, 1H, H<sub>8</sub>), 2.99-2.93 (m, 1H, H<sub>2</sub>), 2.65 (dd, *J* 8.8 and 13.1, 1H, H<sub>8</sub>), 2.52-2.46 (m, 1H, H<sub>2</sub>), 2.12-1.96 (m, 2H, H<sub>3</sub>); δ<sub>C</sub> (100.6 MHz; CDCl<sub>3</sub>) 139.7 (C<sub>Ph</sub>), 139.5 (C<sub>Ph</sub>),

129.6 (C<sub>Ph</sub>), 129.1 (C<sub>5</sub>), 128.9 (C<sub>Ph</sub>), 128.3 (C<sub>Ph</sub>), 128.2 (C<sub>Ph</sub>), 126.9 (C<sub>Ph</sub>), 126.0 (C<sub>Ph</sub>), 125.3 (C<sub>4</sub>), 60.5 (C<sub>6</sub>), 58.5 (C<sub>7</sub>), 45.7 (C<sub>2</sub>), 39.7 (C<sub>8</sub>), 23.8 (C<sub>3</sub>).

$m/z$  264 (MH<sup>+</sup>, 80), 172 (100), 120 (20).

**(±)-6-Pentyl-1-phenyl-1,2,3,6-tetrahydropyridine (Table 2 entry 3)**

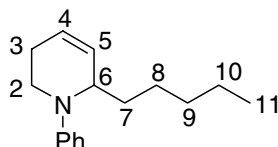

Yellow oil

95% yield

R<sub>f</sub> 0.5 (hexane)

Found: [M+H]<sup>+</sup>, 230.1908. C<sub>16</sub>H<sub>23</sub>N+H requires 230.1908.

$\nu_{\max}/\text{cm}^{-1}$  (neat) 3027, 2954, 2927, 1596, 1502, 1457, 1388, 1319, 1247, 746, 692.

$\delta_{\text{H}}$  (400 MHz; CDCl<sub>3</sub>) 7.29-7.34 (m, 2H, H<sub>Ph</sub>), 6.89 (d, *J* 7.8, 2H, H<sub>Ph</sub>), 6.78-6.74 (m, 1H, H<sub>Ph</sub>), 5.91-5.84 (m, 2H, H<sub>4</sub> and H<sub>5</sub>), 4.07 (br s, 1H, H<sub>6</sub>), 3.68-3.63 (m, 1H, H<sub>2</sub>), 3.28-3.21 (m, 1H, H<sub>2</sub>), 2.41-2.30 (m, 1H, H<sub>3</sub>), 2.06-1.98 (m, 1H, H<sub>3</sub>), 1.68-1.57 (m, 2H, H<sub>7</sub>), 1.45-1.41 (m, 2H, H<sub>8</sub>), 1.36-1.29 (m, 4H, H<sub>9</sub> and H<sub>10</sub>), 0.91 (t, *J* 6.9, 3H, H<sub>11</sub>);  $\delta_{\text{C}}$  (100.6 MHz; CDCl<sub>3</sub>) 150.3 (C<sub>Ph</sub>), 130.0 (C<sub>5</sub>), 129.3 (C<sub>Ph</sub>), 125.5 (C<sub>4</sub>), 117.6 (C<sub>Ph</sub>), 115.2 (C<sub>Ph</sub>), 56.3 (C<sub>6</sub>), 40.5 (C<sub>2</sub>), 32.9 (C<sub>7</sub>), 32.2 (C<sub>8</sub>), 26.2 (C<sub>9</sub>), 24.3 (C<sub>3</sub>), 22.8 (C<sub>10</sub>), 14.2 (C<sub>11</sub>)

$m/z$  230 (MH<sup>+</sup>, 100), 158 (31)

**(±)-6-Benzyl-1-propyl-1,2,3,6-tetrahydropyridine (Table 2 entry 4)**

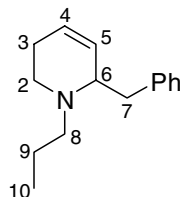

Yellow oil

55% yield

R<sub>f</sub> 0.3 (hexane:ethyl acetate:triethylamine 94:5:1)

Found: [M+H]<sup>+</sup> 216.1752; C<sub>15</sub>H<sub>21</sub>N+H requires 216.1770.

$\nu_{\max}/\text{cm}^{-1}$  (neat) 3060, 3027, 2958, 2931, 2802, 1604, 1494, 1454, 742, 698.

$\delta_{\text{H}}$  (400 MHz;  $\text{CDCl}_3$ ) 7.25-7.13 (m, 5H,  $\text{H}_{\text{Ph}}$ ), 5.70-5.66 (m, 1H,  $\text{H}_4$ ), 5.43-5.40 (m, 1H,  $\text{H}_5$ ), 3.12-3.09 (m, 1H,  $\text{H}_6$ ), 3.02 (dd,  $J$  4.6 and 13.0, 1H,  $\text{H}_7$ ), 2.93 (dt,  $J$  5.8 and 12.0, 1H,  $\text{H}_2$ ), 2.69-2.62 (m, 1H,  $\text{H}_8$ ), 2.51-2.38 (m, 3H,  $\text{H}_2$ ,  $\text{H}_7$  and  $\text{H}_8$ ), 2.10-1.98 (m, 2H,  $\text{H}_3$ ), 1.55-1.44 (m, 2H,  $\text{H}_9$ ), 0.86 (t,  $J$  7.3, 3H,  $\text{H}_{10}$ );  $\delta_{\text{C}}$  (100.6 MHz;  $\text{CDCl}_3$ ) 139.8 ( $\text{C}_{\text{Ph}}$ ), 129.6 ( $\text{C}_5$ ), 129.1 ( $\text{C}_{\text{Ph}}$ ), 128.3 ( $\text{C}_{\text{Ph}}$ ), 126.0 ( $\text{C}_4$ ), 125.1 ( $\text{C}_{\text{Ph}}$ ), 60.7 ( $\text{C}_6$ ), 56.5 ( $\text{C}_8$ ), 46.4 ( $\text{C}_2$ ), 39.4 ( $\text{C}_7$ ), 24.5 ( $\text{C}_3$ ), 20.7 ( $\text{C}_9$ ), 12.1 ( $\text{C}_{10}$ ).  
 $m/z$  216 ( $\text{MH}^+$ , 55), 124 (100).

**( $\pm$ )-1,6-Dibenzyl-2-methyl-1,2,3,6-tetrahydropyridine (Table 2 entry 5); compound 6**

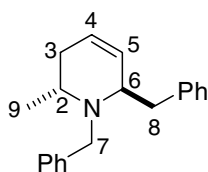

White solid

68% yield

$R_f$  0.4 (hexane:ethyl acetate:triethylamine 94:5:1)

Mp 66-67°C

Found:  $[\text{M}+\text{H}]^+$  278.1908;  $\text{C}_{19}\text{H}_{21}\text{N}+\text{H}$  requires 278.1917.

$\nu_{\text{max}}/\text{cm}^{-1}$  (ethyl acetate) 3025, 2962, 2912, 2829, 1739, 1602, 1494, 1452, 1360, 740, 727, 696.

$\delta_{\text{H}}$  (400 MHz;  $\text{CDCl}_3$ ) 7.26-7.17 (m, 8H,  $\text{H}_{\text{Ph}}$ ), 7.08-7.06 (m, 2H,  $\text{H}_{\text{Ph}}$ ), 5.84-5.81 (m, 1H,  $\text{H}_4$ ), 5.57-5.53 (m, 1H,  $\text{H}_5$ ), 3.78 (d,  $J$  14.1, 1H,  $\text{H}_7$ ), 3.55 (d,  $J$  14.1, 1H,  $\text{H}_7$ ), 3.36-3.28 (m, 1H,  $\text{H}_2$ ), 3.18 (br s, 1H,  $\text{H}_6$ ), 2.94 (dd,  $J$  6.9 and 13.2, 1H,  $\text{H}_8$ ), 2.66 (dd,  $J$  7.7 and 13.2, 1H,  $\text{H}_8$ ), 2.06-1.91 (m, 2H,  $\text{H}_3$ ), 1.18 (d,  $J$  6.7, 3H,  $\text{H}_9$ );  $\delta_{\text{C}}$  (100.6 MHz;  $\text{CDCl}_3$ ) 140.8 ( $\text{C}_{\text{Ph}}$ ), 140.1 ( $\text{C}_{\text{Ph}}$ ), 129.7 ( $\text{C}_5$ ), 128.7 ( $\text{C}_{\text{Ph}}$ ), 128.4 ( $\text{C}_{\text{Ph}}$ ), 128.1 ( $\text{C}_{\text{Ph}}$ ), 126.4 ( $\text{C}_{\text{Ph}}$ ), 125.8 ( $\text{C}_{\text{Ph}}$ ), 125.4 ( $\text{C}_4$ ), 59.3 ( $\text{C}_6$ ), 50.7 ( $\text{C}_7$ ), 47.0 ( $\text{C}_2$ ), 40.7 ( $\text{C}_8$ ), 29.3 ( $\text{C}_3$ ), 17.5 ( $\text{C}_9$ ).  
 $m/z$  278 ( $\text{MH}^+$ , 78), 186 (100).

**( $\pm$ )-1-Benzyl-2-methyl-6-pentyl-1,2,3,6-tetrahydropyridine (Table 2 entry 6)**

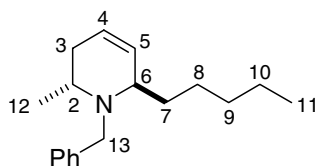

Yellow oil

70% yield

R<sub>f</sub> 0.3 (hexane:ethyl acetate:triethylamine 94:5:1)

Found: [M+H]<sup>+</sup> 258.2222; C<sub>17</sub>H<sub>25</sub>N+H requires 258.2229.

$\nu_{\max}/\text{cm}^{-1}$  (neat) 3023, 2958, 2927, 2856, 1646, 1456, 1361, 696.

$\delta_{\text{H}}$  (400 MHz; CDCl<sub>3</sub>) 7.40-7.38 (m, 2H, H<sub>Ph</sub>), 7.32-7.28 (m, 2H, H<sub>Ph</sub>), 7.26-7.21 (m, 1H, H<sub>Ph</sub>), 5.80-5.77 (m, 1H, H<sub>4</sub>), 5.63-5.59 (m, 1H, H<sub>5</sub>), 3.71 (d, *J* 13.8, 1H, H<sub>13</sub>), 3.50 (d, *J* 13.8, 1H, H<sub>13</sub>), 3.18-3.13 (m, 1H, H<sub>2</sub>), 2.93 (br s, 1H, H<sub>6</sub>), 2.06-1.97 (m, 1H, H<sub>3</sub>), 1.92-1.84 (m, 1H, H<sub>3</sub>), 1.54-1.37 (m, 2H, H<sub>7</sub>), 1.36-1.17 (m, 6H, H<sub>8</sub> H<sub>9</sub> and H<sub>10</sub>), 1.13 (d, *J* 6.7, 3H, H<sub>12</sub>), 0.84 (t, *J* 7.1, 3H, H<sub>11</sub>);  $\delta_{\text{C}}$  (100.6 MHz; CDCl<sub>3</sub>) 141.3 (C<sub>Ph</sub>), 129.8 (C<sub>5</sub>), 128.9 (C<sub>Ph</sub>), 128.1 (C<sub>Ph</sub>), 126.5 (C<sub>Ph</sub>), 124.8 (C<sub>4</sub>), 56.8 (C<sub>6</sub>), 50.8 (C<sub>13</sub>), 46.7 (C<sub>2</sub>), 33.9 (C<sub>7</sub>), 32.0 (C<sub>3</sub>), 29.5 (C<sub>8</sub>), 25.7 (C<sub>9</sub>), 22.8 (C<sub>10</sub>), 16.8 (C<sub>12</sub>), 14.3 (C<sub>11</sub>).

*m/z* 258 (MH<sup>+</sup>, 98), 186 (100).

**(±)-6-Pentyl-2-methyl-1-propyl-1,2,3,6-tetrahydropyridine (Table 2 entry 7)**

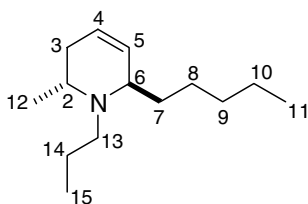

Yellow oil

73% yield

R<sub>f</sub> 0.35 (hexane:ethyl acetate:triethylamine 94:5:1)

Found: [M+H]<sup>+</sup> 210.2222; C<sub>14</sub>H<sub>19</sub>N+H requires 210.2195.

$\nu_{\max}/\text{cm}^{-1}$  (neat) 3020, 2958, 2929, 2871, 1733, 1465, 1375, 1149, 703.

$\delta_{\text{H}}$  (400 MHz; CDCl<sub>3</sub>) 5.72-5.69 (m, 1H, H<sub>4</sub>), 5.62-5.58 (m, 1H, H<sub>5</sub>), 3.11-3.05 (m, 1H, H<sub>2</sub>), 2.93-2.92 (m, 1H, H<sub>6</sub>), 2.41-2.26 (m, 2H, H<sub>13</sub>), 1.98-1.89 (m, 1H, H<sub>3</sub>), 1.85-1.75 (m, 1H, H<sub>3</sub>), 1.44-1.25 (m, 10H, H<sub>7</sub> H<sub>8</sub> H<sub>9</sub> H<sub>10</sub> and H<sub>14</sub>), 1.02 (d, *J* 6.7, 3H, H<sub>12</sub>), 0.90-0.86 (m, 6H, H<sub>11</sub> and H<sub>15</sub>);  $\delta_{\text{C}}$  (100.6 MHz; CDCl<sub>3</sub>) 129.9 (C<sub>5</sub>), 124.7 (C<sub>4</sub>), 57.7 (C<sub>6</sub>), 48.9 (C<sub>13</sub>), 47.0 (C<sub>2</sub>), 33.8 (C<sub>7</sub>), 32.3 (C<sub>8</sub>), 29.7 (C<sub>3</sub>), 26.2 (C<sub>9</sub>), 22.8 (C<sub>10</sub>), 22.2 (C<sub>14</sub>), 16.9 (C<sub>12</sub>), 14.2 (C<sub>11</sub>), 12.2 (C<sub>15</sub>).

*m/z* 210 (MH<sup>+</sup>, 89), 138 (76).



**(±)-6-Benzyl-2-methyl-1-propyl-1,2,3,6-tetrahydropyridine (Table 2 entry 8)**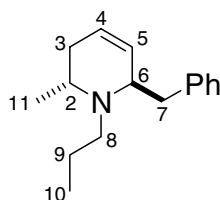

Yellow oil

85% yield

R<sub>f</sub> 0.3 (hexane:ethyl acetate:triethylamine 94:5:1)

Found: [M+H]<sup>+</sup> 230.1908; C<sub>15</sub>H<sub>21</sub>N+H requires 230.1903.

$\nu_{\text{max}}$ /cm<sup>-1</sup> (neat) 3028, 2957, 1660, 1604, 1490, 1452, 1371, 1080, 696.

$\delta_{\text{H}}$  (400 MHz; CDCl<sub>3</sub>) 7.33-7.18 (m, 5H, H<sub>Ph</sub>), 5.77-5.74 (m, 1H, H<sub>4</sub>), 5.52-5.49 (m, 1H, H<sub>5</sub>), 3.25-3.21 (m, 2H, H<sub>2</sub> and H<sub>6</sub>), 2.99 (dd, *J* 6.1 and 12.9, 1H, H<sub>7</sub>), 2.62 (dd, *J* 8.5 and 12.9, 1H, H<sub>7</sub>), 2.47-2.40 (m, 2H, H<sub>8</sub>), 2.04-1.99 (m, 1H, H<sub>3</sub>), 1.91-1.88 (m, 1H, H<sub>3</sub>), 1.41-1.35 (m, 2H, H<sub>9</sub>), 1.09 (d, *J* 6.6, 3H, H<sub>11</sub>), 0.81 (t, *J* 7.3, 3H, H<sub>10</sub>);  $\delta_{\text{C}}$  (100.6 MHz; CDCl<sub>3</sub>) 140.3 (C<sub>Ph</sub>), 129.6 (C<sub>5</sub>), 128.6 (C<sub>Ph</sub>), 128.1 (C<sub>Ph</sub>), 125.9 (C<sub>Ph</sub>), 125.2 (C<sub>4</sub>), 59.8 (C<sub>6</sub>), 49.0 (C<sub>8</sub>), 47.3 (C<sub>2</sub>), 40.4 (C<sub>7</sub>), 29.8 (C<sub>3</sub>), 22.0 (C<sub>9</sub>), 17.1 (C<sub>11</sub>), 12.0 (C<sub>10</sub>).

*m/z* 230 (MH<sup>+</sup>, 81), 138 (100).

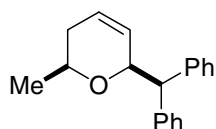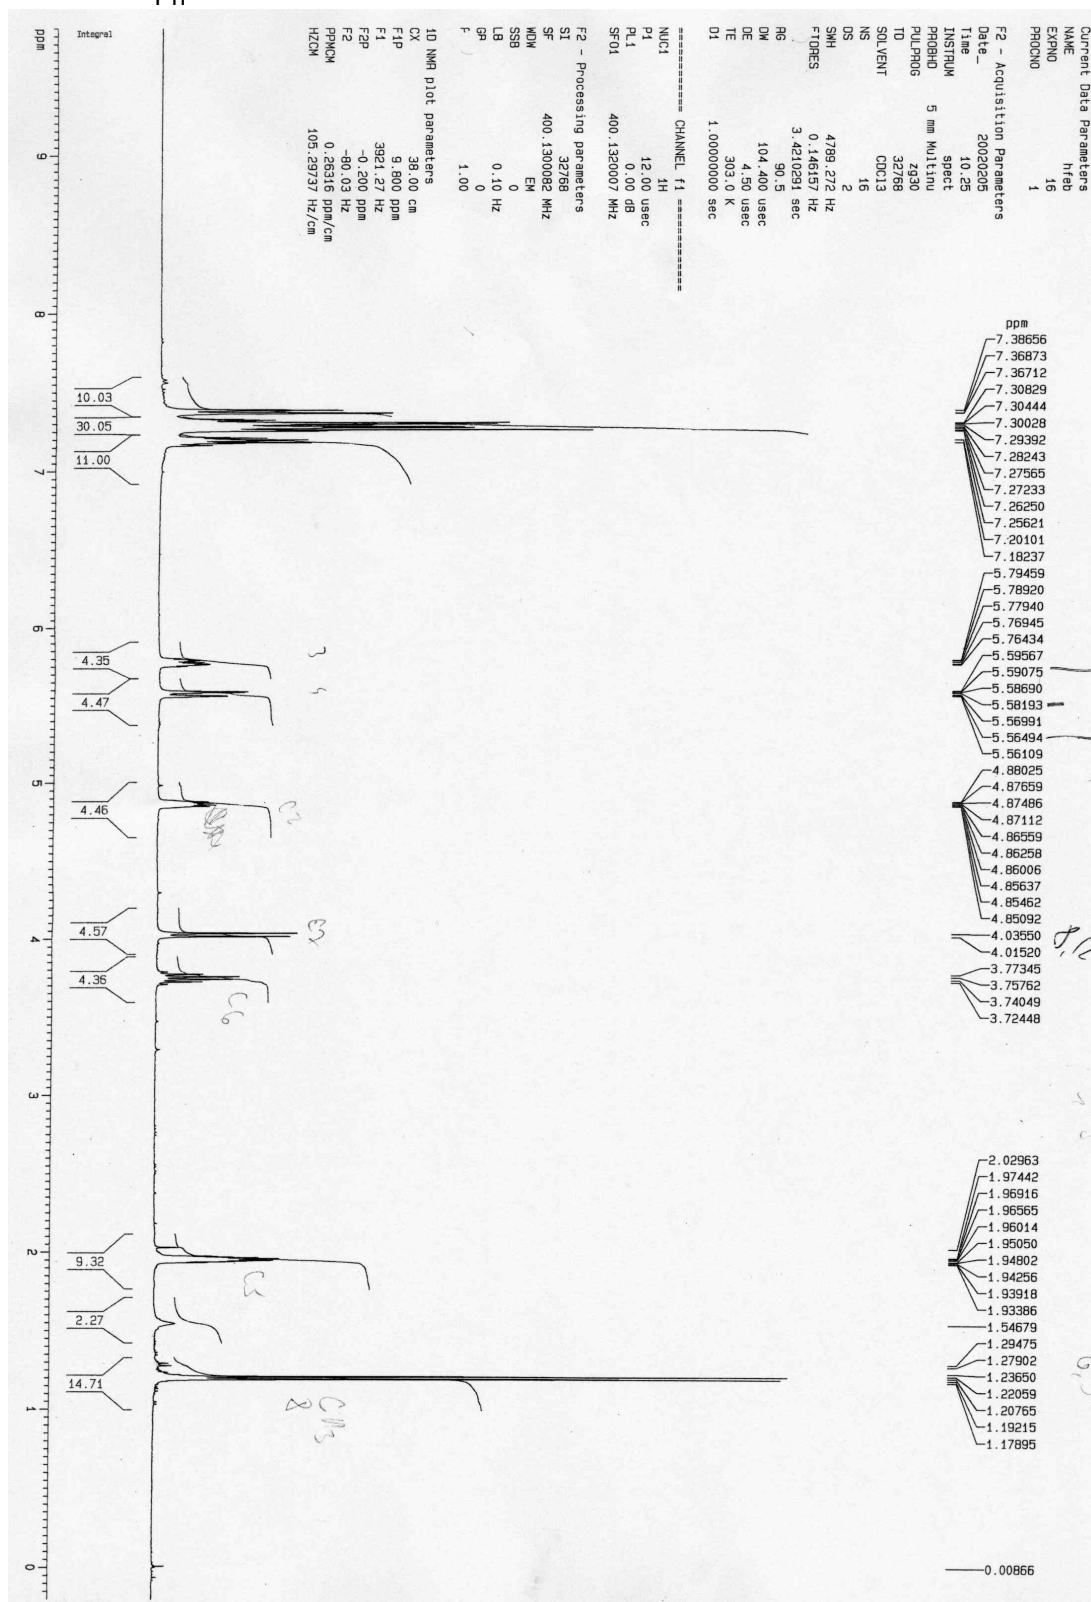

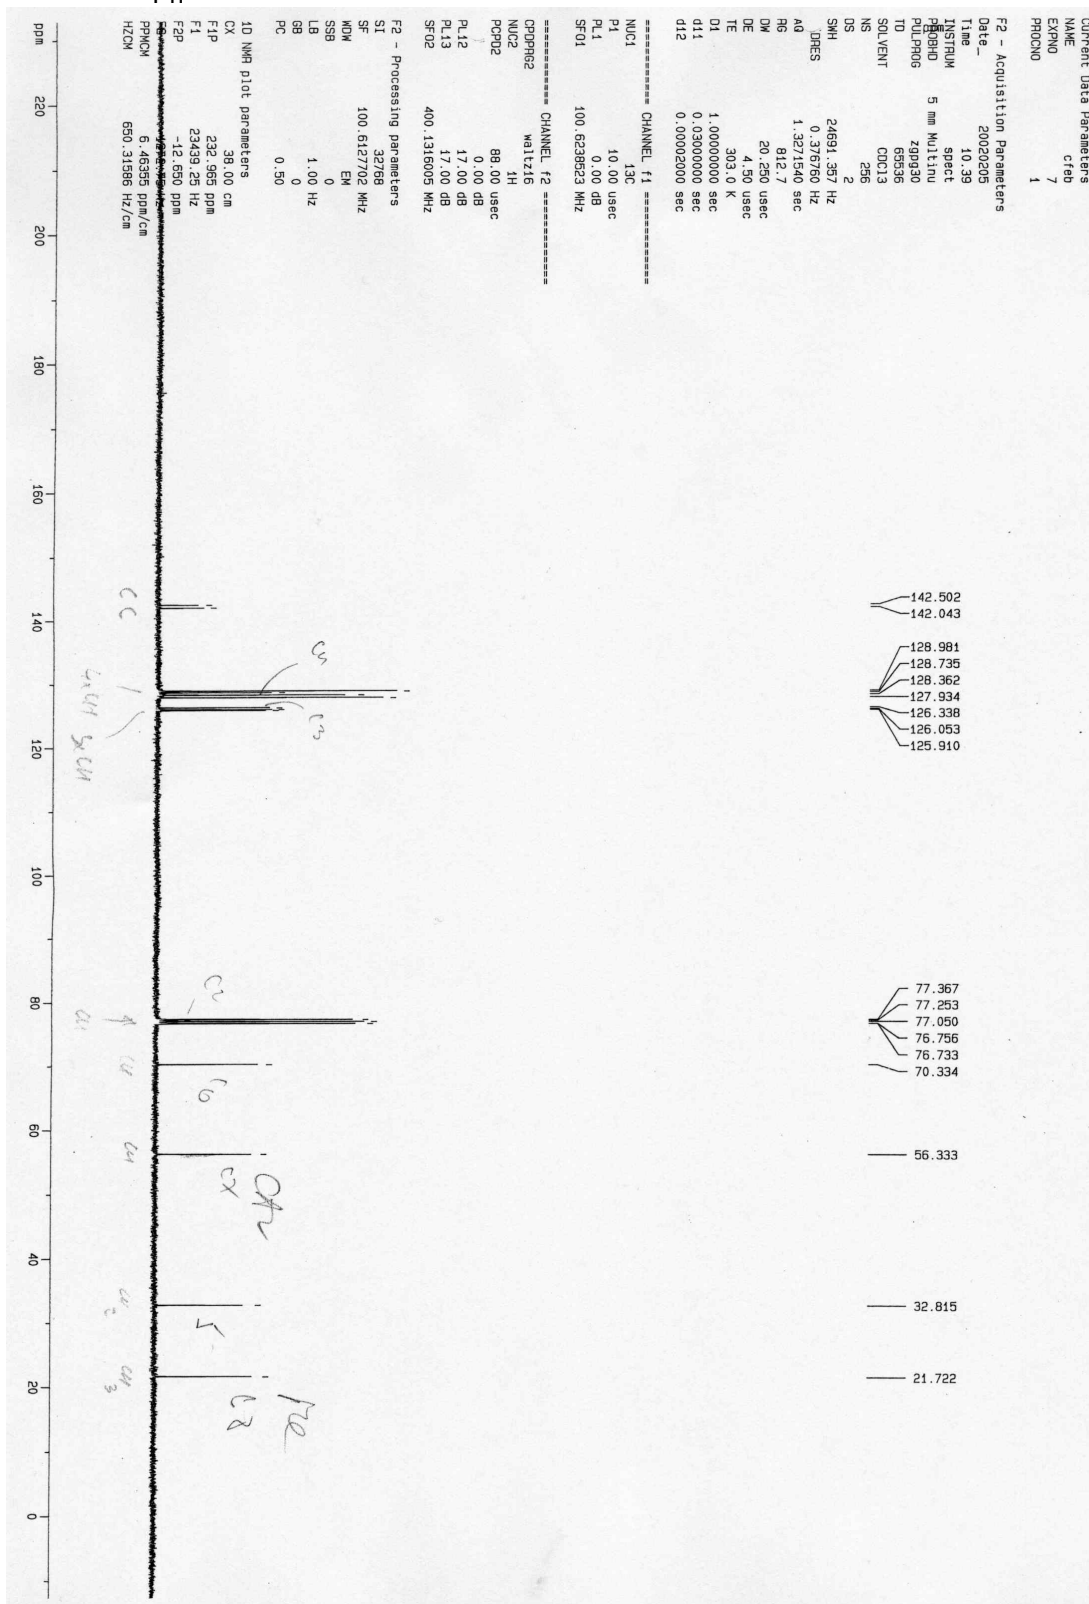

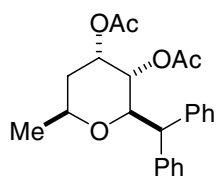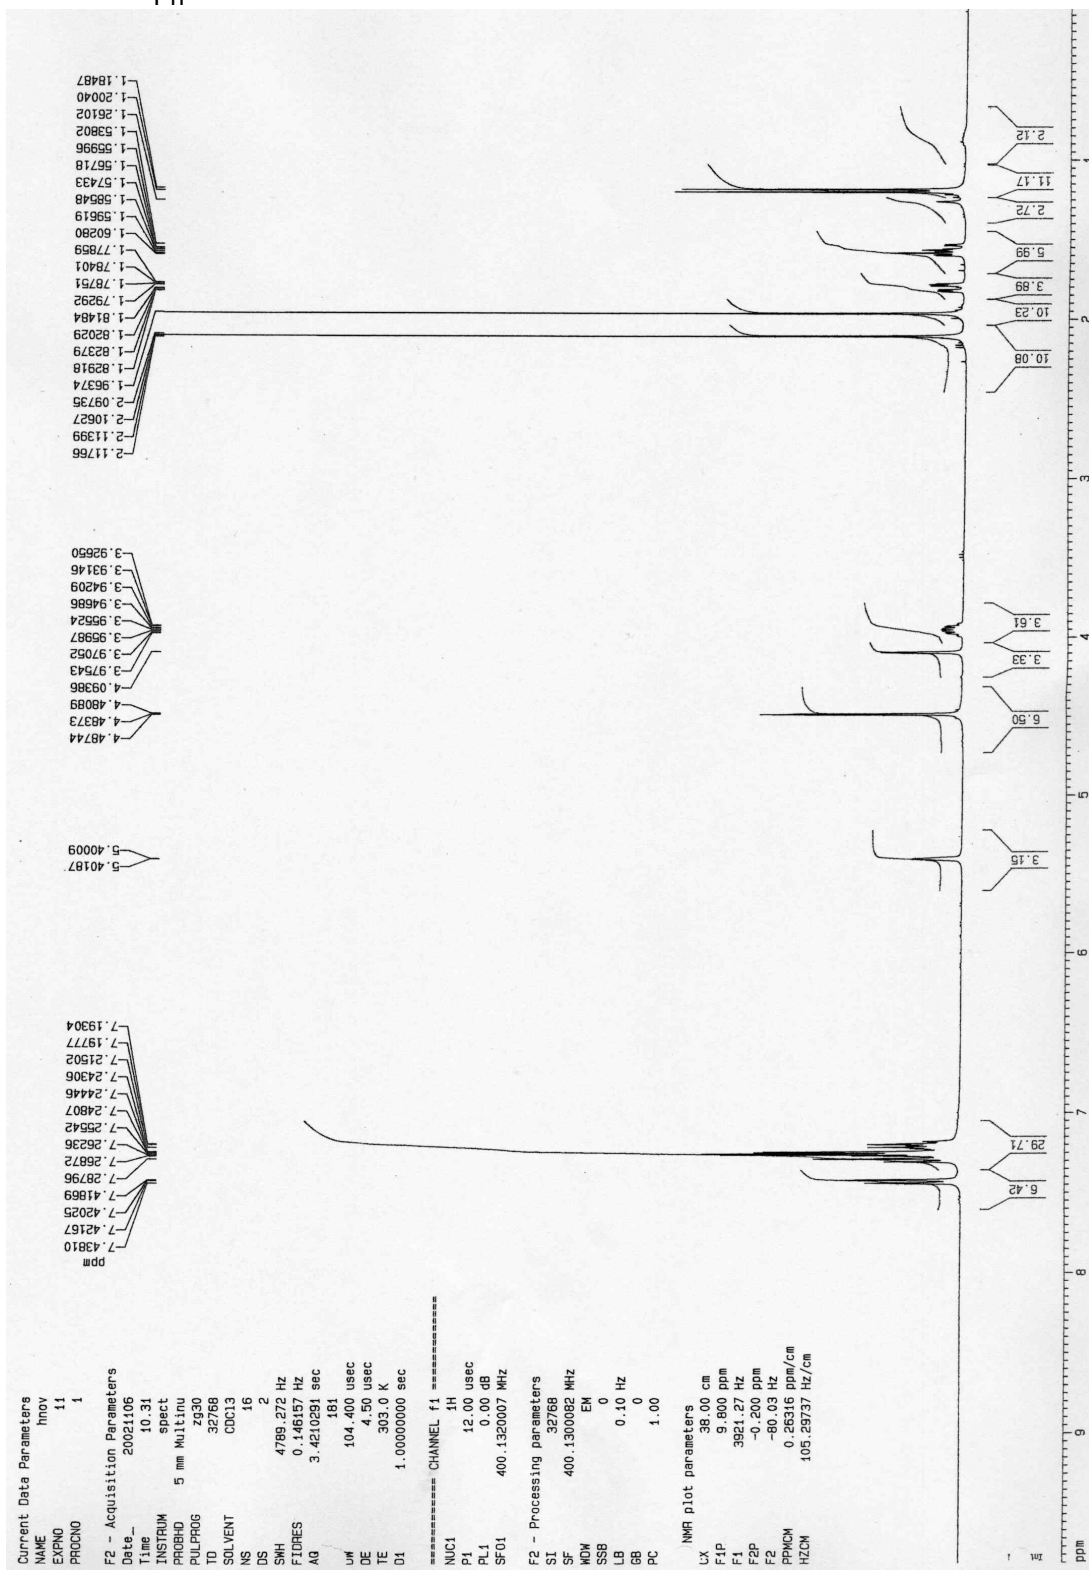

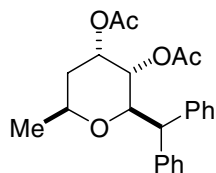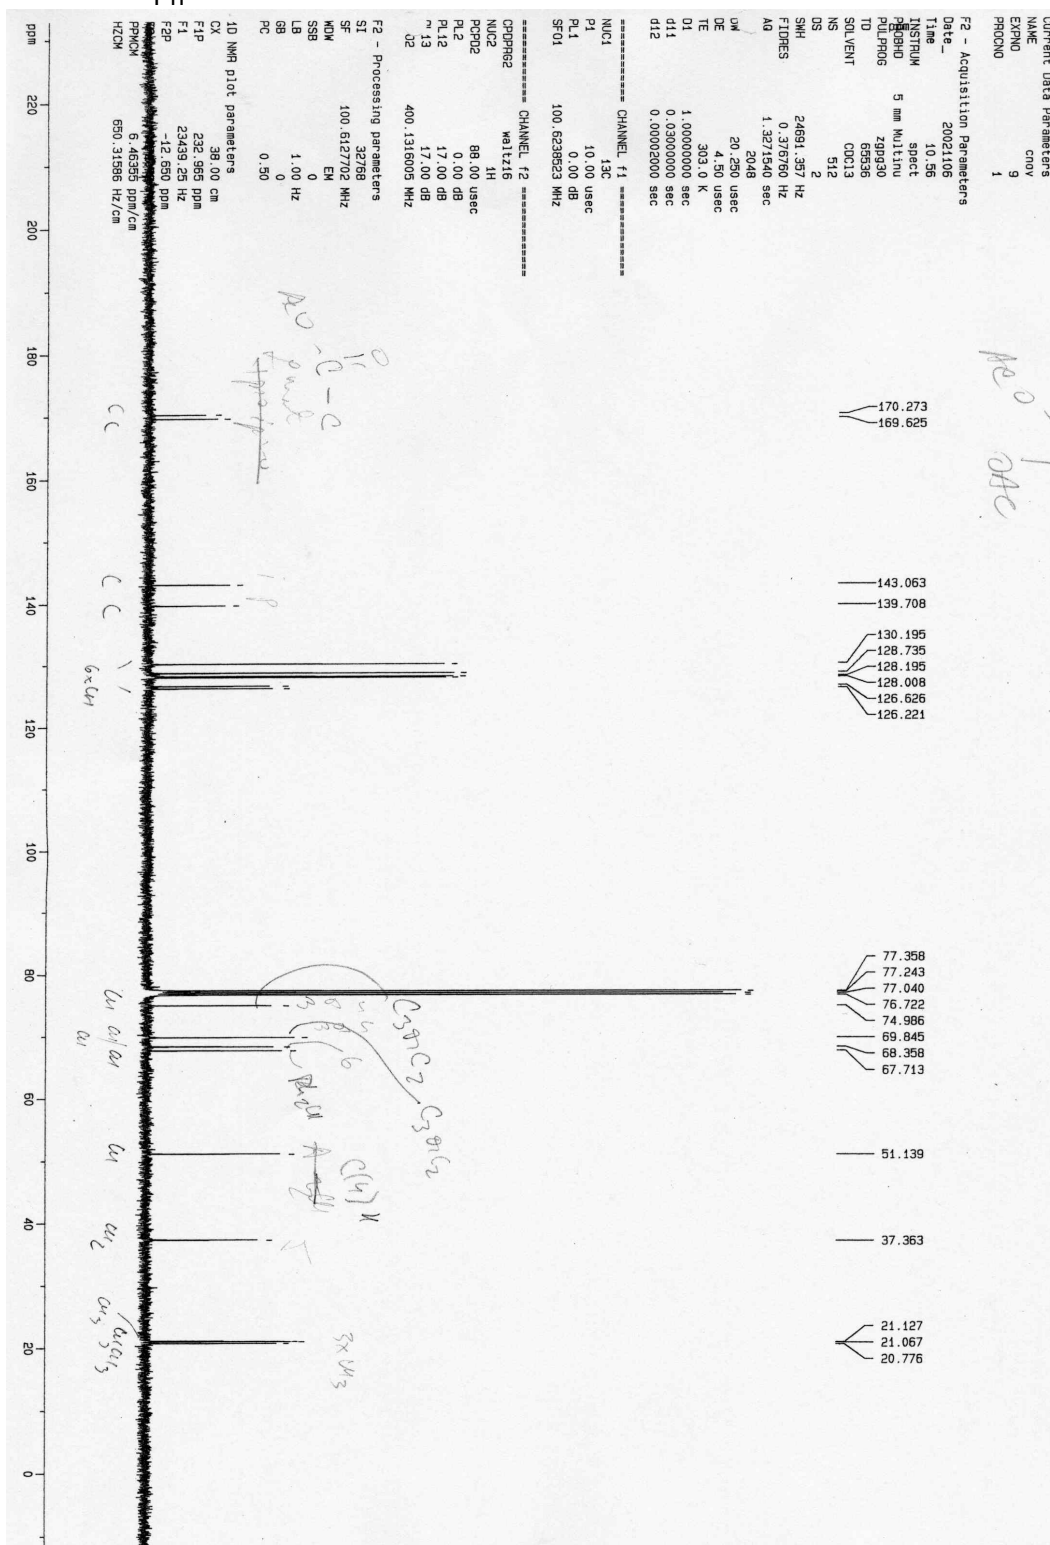

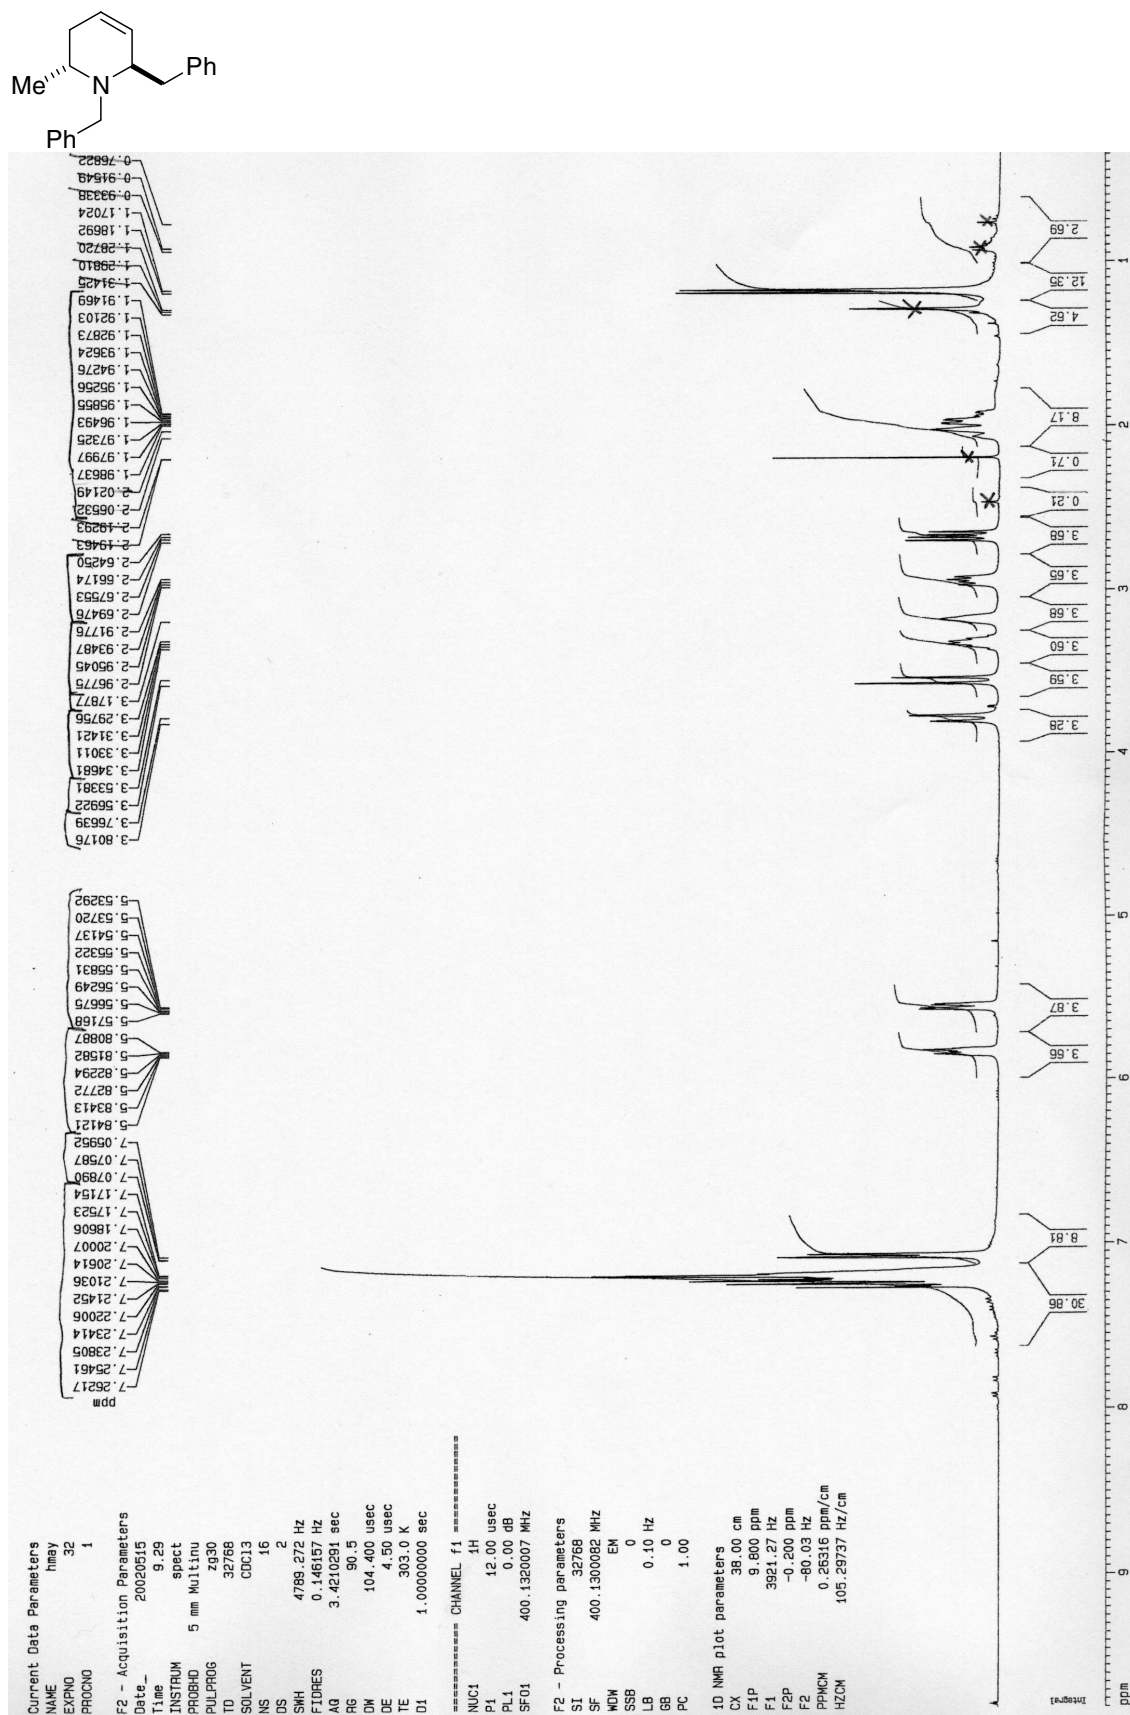

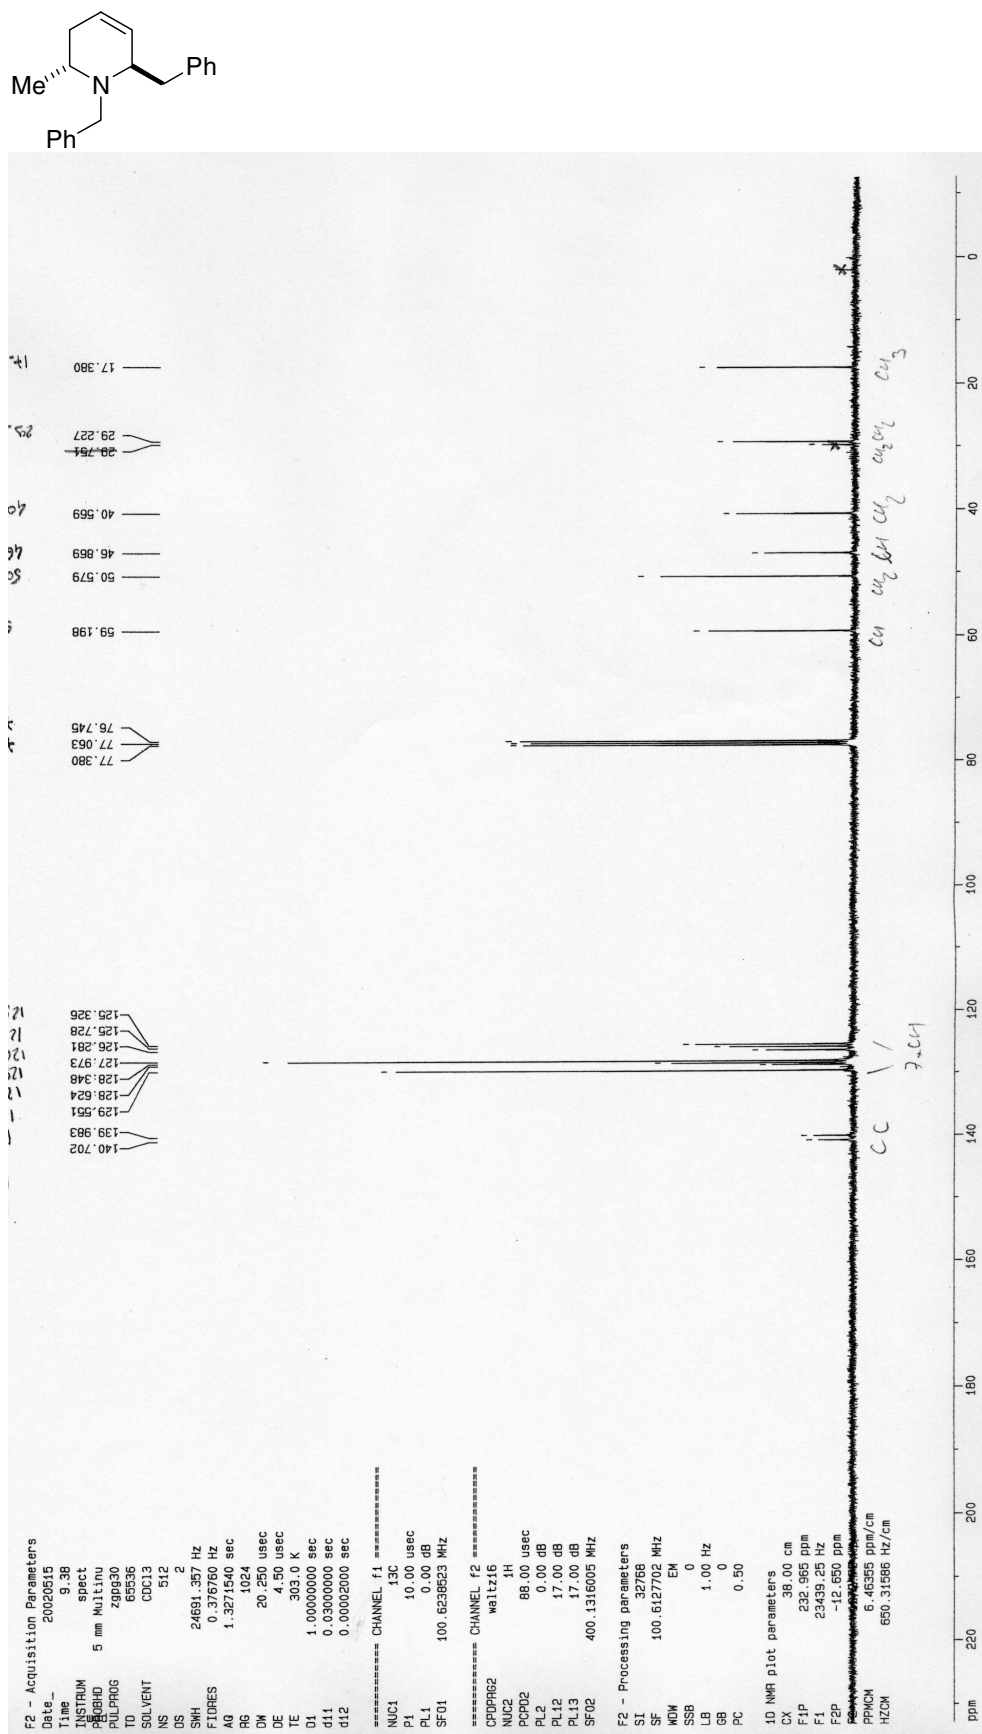

Supplement: Supplementary file 1 [file 5790936]
